# Supplementary material
Source: PubMed Central journal article supplement (PMC2935344)
Supplement: Supp_Data.pdf [file Supp_Data.pdf]

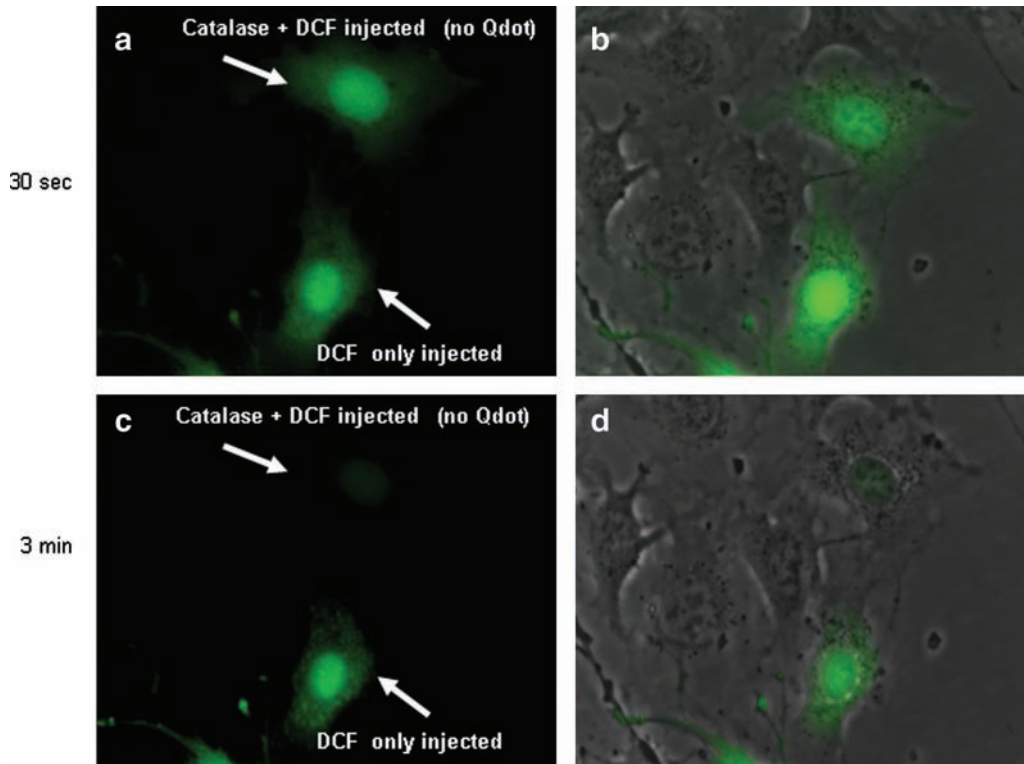

**SUPPLEMENTAL FIG. 1. Qdot does not obscure detection of DCF oxidation during catalase injection.** EOMA cells were injected with DCF in the cytoplasm followed by intranuclear injection of catalase without the streptavidin-tagged Qdot. (a) The field contains two cells that both received DCF injection, but only one cell received the intranuclear catalase, as shown by the *arrow*. (b) The corresponding phase-contrast image is shown to demonstrate that DCF oxidation and inhibition by catalase occurred in the nucleus. (c) The same cells at 3 min of exposure show complete disappearance of DCF oxidation signal in response to nuclear catalase microinjection with (d) corresponding phase-contrast image confirming nuclear localization.
